# Supplementary material for: Measuring the effectiveness of digital nursing technologies: development of a comprehensive digital nursing technology outcome framework based on a scoping review
Source: PubMed Central journal article supplement (PMC7092516; doi:10.1186/s12913-020-05106-8), 2020-03-24
Supplement: 12913_2020_5106_MOESM2_ESM.pdf [file 12913_2020_5106_MOESM2_ESM.pdf]

## Effectiveness Outcomes – Formal Caregivers

| Outcome Area                                                                                                                                                                                                     | Examples for Subcategories or Indicators                                                                                                                                                                                                                                                                                                                |
|------------------------------------------------------------------------------------------------------------------------------------------------------------------------------------------------------------------|---------------------------------------------------------------------------------------------------------------------------------------------------------------------------------------------------------------------------------------------------------------------------------------------------------------------------------------------------------|
| <p><b>(Job) Satisfaction</b><br/>Outcomes that relate to the subjective evaluation of the current life or work situation/condition by a person him/herself</p>                                                   | <ul style="list-style-type: none"> <li>- General job satisfaction</li> <li>- Life satisfaction</li> <li>- Satisfaction with flexibility and autonomy</li> <li>- Satisfaction with professional status</li> </ul>                                                                                                                                        |
| <p><b>Medical Health condition</b><br/>Outcomes that describe the health situation of the formal caregiver</p>                                                                                                   | <ul style="list-style-type: none"> <li>- Occurring diseases</li> <li>- Symptoms (i.e. pain, fatigue)</li> <li>- Use of healthcare services</li> </ul>                                                                                                                                                                                                   |
| <p><b>Psychological Health</b><br/>Outcomes that describe psychological functioning*</p>                                                                                                                         | <ul style="list-style-type: none"> <li>- Psychological well-being (self-confidence, stress, depression loneliness ...)</li> <li>- Psychosocial Adaption (i.e. coping)</li> </ul>                                                                                                                                                                        |
| <p><b>Professional Knowledge and Competences</b><br/>Outcomes that indicate the level of existing professional knowledge, skills and behavioural patterns necessary for the practice of professional nursing</p> | <ul style="list-style-type: none"> <li>- Knowledge on safety regulations (regarding patients)</li> <li>- Knowledge on disease related care</li> <li>- Knowledge on occupational safety</li> <li>- Professionalism</li> </ul>                                                                                                                            |
| <p><b>Physical/ Psychological Workload</b><br/>Outcomes that describe the physical and/or mental effort during the performance of a specific care activity</p>                                                   | <ul style="list-style-type: none"> <li>- Physical Workload (incl. tasks)               <ul style="list-style-type: none"> <li>o Force required to handle Patient</li> <li>o Walking distance</li> </ul> </li> <li>- Psychological Load               <ul style="list-style-type: none"> <li>o Stress in specific work situations</li> </ul> </li> </ul> |
| <p><b>Relationship to the Person in Need of Care</b><br/>Outcomes that indicate the degree of personal and professional connection to the patient</p>                                                            | <ul style="list-style-type: none"> <li>- Relationship continuity</li> <li>- Empathic resonance</li> <li>- Trust</li> <li>- Interpersonal treatment</li> <li>- Time with patient (for building a relationship)</li> </ul>                                                                                                                                |
| <p><b>Overarching Concepts</b> (Comprise different aspects of the above-mentioned dimensions)</p>                                                                                                                |                                                                                                                                                                                                                                                                                                                                                         |
| <p><b>Well-being/ Quality of Life:</b><br/>Outcomes that describe an individual's perceived health status and life circumstances*</p>                                                                            | <ul style="list-style-type: none"> <li>- General QoL-Indicators</li> <li>- Disease specific QoL-Indicators</li> <li>- Subgroup specific QoL-Indicators</li> </ul> <p>Indicator</p> <ul style="list-style-type: none"> <li>- WHO-QoL (WHO-Quality of Life Scale)</li> </ul>                                                                              |
| <p><b>Health related QoL</b><br/>Outcomes that refer to a valuation of an individual's perceived physical, mental and (optionally) social well-being</p>                                                         | <ul style="list-style-type: none"> <li>- General self perceived health status</li> <li>- Disease or symptom specific self perceived health status (i.e. pain level, symptom severity)</li> <li>- Indicators</li> <li>- EQ-5D: EuroQoL-5D</li> <li>- SF-36: 36-Item Short Form Health Survey</li> </ul>                                                  |
| <p><b>Caregiver Burden</b></p>                                                                                                                                                                                   |                                                                                                                                                                                                                                                                                                                                                         |

|                                                                                             |                                                                                                                                                |
|---------------------------------------------------------------------------------------------|------------------------------------------------------------------------------------------------------------------------------------------------|
| Multifactorial outcomes on work related burdens that a professional caregiver is exposed to | Indicators <ul style="list-style-type: none"> <li>- Professional Care Team Burden (PCTB),</li> <li>Caregiver Burden Inventory (CBI)</li> </ul> |
|---------------------------------------------------------------------------------------------|------------------------------------------------------------------------------------------------------------------------------------------------|

### Individual-related organisational Effectiveness

| Outcome Area                                                                                                                                                                                                      | Examples for Subcategories or Indicators                                                                                                                                                                                 |
|-------------------------------------------------------------------------------------------------------------------------------------------------------------------------------------------------------------------|--------------------------------------------------------------------------------------------------------------------------------------------------------------------------------------------------------------------------|
| <b>Employee Satisfaction</b><br>Outcomes that indicate the well-being and general satisfaction with respect to the working conditions of all employees in an organizational unit                                  | <ul style="list-style-type: none"> <li>- Staff moral</li> <li>- Absenteeism</li> <li>- Attrition</li> </ul>                                                                                                              |
| <b>Professional Guideline Compliance</b><br>Outcomes that indicate the degree to which formal caregivers act according to professional guidelines                                                                 | <ul style="list-style-type: none"> <li>- Self-monitoring compliance</li> <li>- Documented compliance</li> <li>- Compliance awareness</li> <li>- Access to guideline information</li> </ul>                               |
| <b>Impact on Workload</b><br>Outcomes that describe the functional load that the performance of a particular work activity of a professional caregiver implies, when it is considered at the organizational level | <ul style="list-style-type: none"> <li>- Workload <ul style="list-style-type: none"> <li>o Tasks</li> <li>o Frequency</li> <li>o Intensity (daily work hours)</li> <li>o Time spent on caregiving</li> </ul> </li> </ul> |

\* Definitions based on NOC (5<sup>th</sup> edition)

5<sup>th</sup> Edition:

[https://www.academia.edu/38156239/Nursing\\_Outcomes\\_Classification\\_NOC\\_Moorhead\\_HERRY\\_.pdf](https://www.academia.edu/38156239/Nursing_Outcomes_Classification_NOC_Moorhead_HERRY_.pdf)
