# Supplementary material for: Measuring the effectiveness of digital nursing technologies: development of a comprehensive digital nursing technology outcome framework based on a scoping review
Source: PubMed Central journal article supplement (PMC7092516; doi:10.1186/s12913-020-05106-8), 2020-03-24
Supplement: 12913_2020_5106_MOESM4_ESM.pdf [file 12913_2020_5106_MOESM4_ESM.pdf]

## Effectiveness Outcomes – Organisation

| Outcome Area                                                                                                                                                                                 | Examples for Subcategories or Indicators                                                                                                                                                                                                             |
|----------------------------------------------------------------------------------------------------------------------------------------------------------------------------------------------|------------------------------------------------------------------------------------------------------------------------------------------------------------------------------------------------------------------------------------------------------|
| <p><b>Care process quality</b><br/>Outcomes that indicate the general quality of the nursing process in an organisation</p>                                                                  | <ul style="list-style-type: none"> <li>- Risk of poor treatment</li> <li>- Quality of assessment and documentation</li> <li>- Healing/Recovery rates</li> <li>- Readmission rates</li> <li>- Medication administration (errors, accuracy)</li> </ul> |
| <p><b>Access to care</b><br/>Outcomes that describe the degree of the access to and availability of certain services</p>                                                                     | <ul style="list-style-type: none"> <li>- Accessibility (physical/remote)</li> <li>- Availability of services (geographic, timeliness, barriers)</li> </ul>                                                                                           |
| <p><b>Communication/Social interaction</b><br/>Outcomes that describe the communication between different groups within an organization and the social interactions and collaboration</p>    | <ul style="list-style-type: none"> <li>- Relationship quality</li> <li>- Communication intensity</li> <li>- Communication errors</li> <li>- Interprofessional relationship</li> </ul>                                                                |
| <p><b>Recruitment and Staffing</b><br/>Outcomes that describe aspects related to the recruitment of employees and the maintenance of employee quantity and quality</p>                       | <ul style="list-style-type: none"> <li>- Recruitment related outcomes</li> <li>- Staff retention</li> <li>- Absenteeism</li> <li>- Personnel development</li> </ul>                                                                                  |
| <p><b>Working Conditions</b><br/>Outcomes that describe the general working conditions within an organisation</p>                                                                            | <ul style="list-style-type: none"> <li>- Physical (noise, vibration)</li> <li>- Organisational (monotonicity, variety)</li> <li>- Working Hours (nightshifts, scheduling)</li> </ul>                                                                 |
| <p><b>Operational Efficiency</b><br/>Outcome measures that indicate the degree to which efficient processes are designed by an organization to help improve productivity and performance</p> | <ul style="list-style-type: none"> <li>- Efficient usage of resources</li> <li>- Organisational workflow</li> <li>- Operational efficiency (staff per patient)</li> <li>- Efficiency of work processes</li> <li>- Productivity</li> </ul>            |
| <p><b>Financial Performance</b><br/>Outcomes that indicate the financial result that an organization is capable of producing</p>                                                             | <ul style="list-style-type: none"> <li>- Profitability</li> <li>- Financial sustainability</li> <li>- Debts</li> </ul>                                                                                                                               |
| <p><b>Overarching Concepts</b> (Comprise different aspects of the above-mentioned dimensions)</p>                                                                                            |                                                                                                                                                                                                                                                      |
| <p><b>Hospital/Nursing Home Quality</b><br/>Outcomes that summarise the quality of a care of an institution in different dimensions</p>                                                      | <p>Indicators:</p> <ul style="list-style-type: none"> <li>- QAS: Quality Improvement Activities Survey</li> <li>- CPS: Clinicians' Perceptions of Quality Survey</li> </ul>                                                                          |
