# Supplementary material for: Measuring the effectiveness of digital nursing technologies: development of a comprehensive digital nursing technology outcome framework based on a scoping review
Source: BMC Health Serv Res. 2020 Mar 24;20:243. doi: 10.1186/s12913-020-05106-8 (PMC7092516; doi:10.1186/s12913-020-05106-8)
Supplement: Supplementary file 1 — Additional file 1. Definitions and Examples for Outcome Areas for Persons in Need of Care. [file 12913_2020_5106_MOESM1_ESM.pdf]

## Effectiveness Outcomes – Person in need of care related

| Outcome Area                                                                                                                                                                                                                                | Examples for Subcategories or Indicators                                                                                                                                                                                                                                                                                                                                            |
|---------------------------------------------------------------------------------------------------------------------------------------------------------------------------------------------------------------------------------------------|-------------------------------------------------------------------------------------------------------------------------------------------------------------------------------------------------------------------------------------------------------------------------------------------------------------------------------------------------------------------------------------|
| <b>Functional Health</b><br>Outcomes that describe capacity for and performance of basic tasks of life*                                                                                                                                     | <ul style="list-style-type: none"> <li>- Mobility</li> <li>- Self-care (ADL/IADL)</li> <li>- Energy maintenance (i.e. sleep patterns)</li> <li>- Activity Level</li> <li>- Required care levels</li> <li>- Level of independence (perceived)</li> </ul>                                                                                                                             |
| <b>Physiological Health</b><br>Outcome that describe organic functioning*                                                                                                                                                                   | <ul style="list-style-type: none"> <li>- Metabolic Regulation (vital signs)</li> <li>- Electrolyte &amp; Acid/Base Balance</li> <li>- Tissue Integrity (i.e. wound healing)</li> <li>- Neurocognitive functions/condition</li> <li>- Therapeutic response (reactions to treatment)</li> </ul>                                                                                       |
| <b>Psychological Health</b><br>Outcomes that describe psychological functioning*                                                                                                                                                            | <ul style="list-style-type: none"> <li>- Psychological well-being (i.e. agitation, loneliness, stress-level)</li> <li>- Psychosocial adaption (i.e. Coping, acceptance of health status)</li> <li>- Self-control (challenging behaviour)</li> </ul>                                                                                                                                 |
| <b>Social Condition</b><br>Outcomes that describe social functioning and social inclusion                                                                                                                                                   | <ul style="list-style-type: none"> <li>- social interactions (verbal and visual engagement)</li> <li>- social relation to caregiver</li> <li>- social participation/ social inclusion</li> </ul>                                                                                                                                                                                    |
| <b>Health Behaviour</b><br>Outcomes that describe an individual's actions to promote or restore health*                                                                                                                                     | <ul style="list-style-type: none"> <li>- Therapy compliance</li> <li>- Dealing independently with requirements and strains caused by illness or therapy</li> <li>- Patient engagement</li> </ul>                                                                                                                                                                                    |
| <b>Health Knowledge &amp; Attitudes</b><br>Outcomes that describe an individual's understanding in applying information to promote maintain and restore health* (or an individual's ideas and perceptions that influence health behaviour*) | <ul style="list-style-type: none"> <li>- Knowledge on health promotion, healthy lifestyle</li> <li>- Knowledge on medication (pain management)</li> <li>- Disease/health situation related knowledge</li> <li>- Perceived ability to perform</li> </ul>                                                                                                                             |
| <b>Patient Safety</b><br>Outcomes that describe an individual's safety status*                                                                                                                                                              | <ul style="list-style-type: none"> <li>- Fall prevention behaviour</li> <li>- Falls occurrence</li> </ul>                                                                                                                                                                                                                                                                           |
| <b>Overarching Concepts</b> (Comprise different aspects of the above-mentioned dimensions)                                                                                                                                                  |                                                                                                                                                                                                                                                                                                                                                                                     |
| <b>Well-being/ Quality of Life</b><br>Outcomes that describe an individual's perceived health status and life circumstances*                                                                                                                | <ul style="list-style-type: none"> <li>- General QoL-Indicators</li> <li>- Disease specific QoL-Indicators</li> <li>- Subgroup specific QoL-Indicators</li> </ul> Indicators <ul style="list-style-type: none"> <li>- ASCOT (Adult Social Care Outcomes Toolkit)</li> <li>- WHO-QoL (WHO-Quality of Life Scale)</li> <li>- QoL-AD (Quality of Life in Alzheimer Disease)</li> </ul> |
| <b>Health related QoL</b><br>Outcomes that refer to a valuation of an individual's perceived physical, mental and (optionally) social well-being                                                                                            | <ul style="list-style-type: none"> <li>- General self-perceived health status</li> <li>- Disease or symptom specific self-perceived health status (i.e. pain level, symptom severity)</li> </ul> Indicators <ul style="list-style-type: none"> <li>- EQ-5D, SF-36</li> </ul>                                                                                                        |

|                                                                                                                                                                                     |                                                                                                                                                                                        |
|-------------------------------------------------------------------------------------------------------------------------------------------------------------------------------------|----------------------------------------------------------------------------------------------------------------------------------------------------------------------------------------|
| <b>Needs Assessment/ Fulfilled Needs</b><br>Outcomes that relate to systematic processes for determining and addressing needs (discrepancies between current and wanted conditions) | <b>Indicators</b> <ul style="list-style-type: none"> <li>- IPPA (Individually Prioritized Assessment score)</li> <li>- CANE (Camberwell Assessment of Need for the Elderly)</li> </ul> |
|-------------------------------------------------------------------------------------------------------------------------------------------------------------------------------------|----------------------------------------------------------------------------------------------------------------------------------------------------------------------------------------|

### Individual-related organisational Effectiveness

|                                                                                                                                                                               |                                                                                                                                                                                                                                |
|-------------------------------------------------------------------------------------------------------------------------------------------------------------------------------|--------------------------------------------------------------------------------------------------------------------------------------------------------------------------------------------------------------------------------|
| <b>Intensity of Service Utilization</b><br>Outcomes that describe the length or intensity of usage of a specific health care service                                          | <ul style="list-style-type: none"> <li>- Length of stay</li> <li>- Number of (re)admissions to specific institutions</li> <li>- Days in need of specific services/medication (i.e. number of days with antibiotics)</li> </ul> |
| <b>Organisational Patient Safety Indicators</b><br>Outcomes that describe safety-related negative organisational incidents                                                    | <ul style="list-style-type: none"> <li>- Mortality</li> <li>- Occurrence of medical complications (i.e. number of cardiac arrest calls, infection rates)</li> <li>- Occurrence of adverse events (i.e. falls)</li> </ul>       |
| <b>Patient Satisfaction</b><br>Outcomes that describe an individual's perception of the quality and adequacy of health/nursing care provided*                                 | <ul style="list-style-type: none"> <li>- Satisfaction with access to care resources</li> <li>- Satisfaction with performance of services</li> <li>- Satisfaction with adequacy of provided services</li> </ul>                 |
| <b>Intersectoral Continuity of Care</b><br>Outcomes relating to patient transfers and the collaboration between different care providers or different units of care providers | <ul style="list-style-type: none"> <li>- Continuity of care inside institutions (i.e. different units in hospitals)</li> <li>- Continuity of care between different institutions</li> </ul>                                    |

\* Definitions based on NOC (5<sup>th</sup> edition)

5<sup>th</sup> Edition:

[https://www.academia.edu/38156239/Nursing\\_Outcomes\\_Classification\\_NOC\\_Moorhead\\_HERRY\\_.pdf](https://www.academia.edu/38156239/Nursing_Outcomes_Classification_NOC_Moorhead_HERRY_.pdf)
